# Supplementary material for: Starch Synthesis-Related Genes (SSRG) Evolution in the Genus Oryza
Source: MDPI journal article supplement (doi:10.3390/plants10061057), 2021-05-25
Supplement: s1 [file s1]

**Table S1.** Full information about each of the Starch Synthesis-Related Genes (SSRGs) analyzed.

| Locus name     | # of Transcripts | RAP-DB/Ensembl ID    | Location | Start    | End      | Size (pb) | ID    | E-value |
|----------------|------------------|----------------------|----------|----------|----------|-----------|-------|---------|
| <i>AGPL1</i>   | 1                | <i>Os05g0580000</i>  | Chr. 5   | 28871811 | 28877272 | 5462      |       |         |
| <i>AGPL3</i>   | 2                | <i>Os03g0735000</i>  | Chr. 3   | 30099369 | 30104572 | 5204      |       |         |
| <i>AGPL4</i>   | 1                | <i>Os07g0243200</i>  | Chr. 7   | 7983125  | 7989283  | 6159      |       |         |
| <i>AGPS2a</i>  | 4                | <i>Os08g0345800</i>  | Chr. 8   | 15666389 | 15672583 | 6248      |       |         |
| <i>ALK</i>     | 1                | <i>Os06g0229800</i>  | Chr. 6   | 6748398  | 6753302  | 4916      |       |         |
| <i>DPEI</i>    | 1                | <i>Os07g0627000</i>  | Chr. 7   | 25980423 | 25984853 | 4431      |       |         |
| <i>GBSSII</i>  | 2                | <i>Os07g0412100</i>  | Chr. 7   | 12916883 | 12924202 | 7320      |       |         |
| <i>ISA</i>     | 1                | <i>Os08g0520900</i>  | Chr. 8   | 25893657 | 25900576 | 6920      |       |         |
| <i>PUL</i>     | 1                | <i>Os04g0164900</i>  | Chr. 4   | 4408357  | 4418889  | 10533     |       |         |
| <i>SBE1</i>    | 4                | <i>Os06g0726400</i>  | Chr. 6   | 30897378 | 30905803 | 8426      |       |         |
| <i>SBE3</i>    | 1                | <i>Os02g0528200</i>  | Chr. 2   | 19355790 | 19367127 | 11338     |       |         |
| <i>SSI</i>     | 1                | <i>Os06g0160700</i>  | Chr. 6   | 3079296  | 3086808  | 7513      |       |         |
| <i>SSII 1</i>  | 1                | <i>Os10t0437600</i>  | Chr. 10  | 15673243 | 15681075 | 7833      |       |         |
| <i>SSII 2</i>  | 2                | <i>Os02g0744700</i>  | Chr. 2   | 31233292 | 31238210 | 4929      |       |         |
| <i>SSIII 1</i> | 2                | <i>Os04g0624600</i>  | Chr. 4   | 31751600 | 31759420 | 7821      |       |         |
| <i>SSIII 2</i> | 1                | <i>Os08g0191433</i>  | Chr. 8   | 5353697  | 5363276  | 9580      |       |         |
| <i>SSIV 1</i>  | 4                | <i>Os01g0720600</i>  | Chr. 1   | 30032428 | 30041425 | 8998      |       |         |
| <i>SSIV 2</i>  | 2                | <i>Os05g0533600</i>  | Chr. 5   | 26485770 | 26493983 | 8214      |       |         |
| <i>Wx</i>      | 2                | <i>Os06g0133000</i>  | Chr. 6   | 1765622  | 1770653  | 5032      |       |         |
| <i>AGPL1</i>   | 1                | <i>BGIOSGA017490</i> | Chr. 5   | 30220701 | 30222552 | 3388      | 99.9  | 0.0     |
| <i>AGPL3</i>   | 1                | <i>BGIOSGA009855</i> | Chr. 3   | 34318562 | 34322802 | 4241      | 99.6  | 0.0     |
| <i>AGPL4</i>   | 1                | <i>BGIOSGA024540</i> | Chr. 7   | 7995391  | 7999961  | 4571      | 99.6  | 0.0     |
| <i>AGPS2a</i>  | 1                | <i>BGIOSGA027135</i> | Chr. 8   | 16750552 | 16746477 | 4076      | 99.5  | 0.0     |
| <i>ALK</i>     | 1                | <i>BGIOSGA022586</i> | Chr. 6   | 7778365  | 7782784  | 4420      | 99.9  | 0.0     |
| <i>DPEI</i>    | 1                | <i>BGIOSGA026185</i> | Chr. 7   | 24042478 | 24046564 | 4087      | 99.7  | 0.0     |
| <i>GBSSII</i>  | 1                | <i>BGIOSGA024424</i> | Chr. 7   | 12148263 | 12152181 | 3919      | 99.2  | 0.0     |
| <i>ISA</i>     | 1                | <i>BGIOSGA026650</i> | Chr. 8   | 27633755 | 27640589 | 6835      | 99.9  | 0.0     |
| <i>PUL</i>     | 1                | <i>BGIOSGA015875</i> | Chr. 4   | 3476296  | 3488775  | 12480     | 98.2  | 0.0     |
| <i>SBE1</i>    | 1                | <i>BGIOSGA020506</i> | Chr. 6   | 32596001 | 32603277 | 7277      | 99.8  | 0.0     |
| <i>SBE3</i>    | 1                | <i>BGIOSGA006344</i> | Chr. 2   | 20764778 | 20775734 | 10957     | 99.7  | 0.0     |
| <i>SSI</i>     | 1                | <i>BGIOSGA021860</i> | Chr. 6   | 3609454  | 3616267  | 6814      | 100.0 | 0.0     |
| <i>SSII 1</i>  | 1                | <i>BGIOSGA033011</i> | Chr. 10  | 14120504 | 14127623 | 7120      | 99.6  | 0.0     |
| <i>SSII 2</i>  | 1                | <i>BGIOSGA005631</i> | Chr. 2   | 33274118 | 33278322 | 4215      | 99.8  | 0.0     |
| <i>SSIII1</i>  | 1                | <i>BGIOSGA014316</i> | Chr. 4   | 30784815 | 30792005 | 7186      | 99.9  | 0.0     |
| <i>SSIII 2</i> | 1                | <i>BGIOSGA028122</i> | Chr. 8   | 5614172  | 5624994  | 10823     | 99.7  | 0.0     |
| <i>SSIV 1</i>  | 1                | <i>BGIOSGA000900</i> | Chr. 1   | 33261071 | 33269378 | 8308      | 99.7  | 0.0     |
| <i>SSIV 2</i>  | 1                | <i>BGIOSGA020250</i> | Chr. 5   | 27869304 | 27876940 | 7637      | 99.7  | 0.0     |
| <i>Wx</i>      | 1                | <i>BGIOSGA022241</i> | Chr. 6   | 1931535  | 1935014  | 3480      | 100.0 | 0.0     |
| <i>AGPL1</i>   | 1                | <i>ORUF105G29020</i> | Chr. 5   | 25558424 | 25561810 | 3387      | 100.0 | 0.0     |
| <i>AGPL3</i>   | 1                | <i>ORUF103G34620</i> | Chr. 3   | 28543622 | 28547924 | 4303      | 99.8  | 0.0     |

|                |                |                      |         |          |          |       |       |     |
|----------------|----------------|----------------------|---------|----------|----------|-------|-------|-----|
| <i>AGLP4</i>   | 1              | <i>ORUF107G08660</i> | Chr. 7  | 7250572  | 7256218  | 5647  | 99.9  | 0.0 |
| <i>AGPS2a</i>  | 2              | <i>ORUF108G13010</i> | Chr. 8  | 13811400 | 13817275 | 5876  | 100.0 | 0.0 |
| <i>ALK</i>     | 1              | <i>ORUF106G08580</i> | Chr. 6  | 6231488  | 6236538  | 5051  | 99.5  | 0.0 |
| <i>DPEI</i>    | 2              | <i>ORUF107G24050</i> | Chr. 7  | 22751548 | 22756102 | 4555  | 100   | 0.0 |
| <i>GBSSII</i>  | 1              | <i>ORUF107G11630</i> | Chr. 7  | 11317247 | 11324432 | 7186  | 99.1  | 0.0 |
| <i>ISA</i>     | 1              | <i>ORUF108G23320</i> | Chr. 8  | 23528272 | 23535101 | 6830  | 99.9  | 0.0 |
| <i>PUL</i>     | 1              | <i>ORUF104G02940</i> | Chr. 4  | 3519334  | 3532236  | 12903 | 98.3  | 0.0 |
| <i>SBE1</i>    | 5              | <i>ORUF106G29940</i> | Chr. 6  | 27526184 | 27533602 | 7419  | 99.8  | 0.0 |
| <i>SBE3</i>    | 1              | <i>ORUF102G19870</i> | Chr. 2  | 18185004 | 18195898 | 10895 | 100.0 | 0.0 |
| <i>SSI</i>     | 1              | <i>ORUF106G04040</i> | Chr. 6  | 2791984  | 2798799  | 6816  | 99.9  | 0.0 |
| <i>SSII 1</i>  | 3              | <i>ORUF110G11670</i> | Chr. 10 | 13668717 | 13679236 | 10520 | 99.7  | 0.0 |
| <i>SSII 2</i>  | 2              | <i>ORUF102G33990</i> | Chr. 2  | 29295244 | 29299474 | 4231  | 99.8  | 0.0 |
| <i>SSIII 1</i> | 1              | <i>ORUF104G27570</i> | Chr. 4  | 27123710 | 27130905 | 7196  | 99.9  | 0.0 |
| <i>SSIII 2</i> | 3              | <i>ORUF108G05900</i> | Chr. 8  | 4762126  | 4775482  | 13357 | 99.4  | 0.0 |
| <i>SSIV 1</i>  | 3              | <i>ORUF101G32260</i> | Chr. 1  | 27539416 | 27547732 | 8317  | 99.9  | 0.0 |
| <i>SSIV 2</i>  | 2              | <i>ORUF105G25430</i> | Chr. 5  | 23281640 | 23290019 | 8380  | 99.8  | 0.0 |
| <i>Wx</i>      | 2              | <i>ORUF106G02030</i> | Chr. 6  | 1559398  | 1564292  | 4895  | 99.9  | 0.0 |
| <i>AGPL1</i>   | 2              | <i>ONIVA05G29110</i> | Chr. 5  | 26996830 | 26999189 | 5239  | 100.0 | 0.0 |
| <i>AGPL3</i>   | 1              | <i>ONIVA03G34930</i> | Chr. 3  | 30015137 | 30019384 | 4248  | 99.6  | 0.0 |
| <i>AGPL4</i>   | 1              | <i>ONIVA07G07390</i> | Chr. 7  | 6096533  | 6102180  | 5648  | 99.7  | 0.0 |
| <i>AGPS2a</i>  | 2              | <i>ONIVA04G29180</i> | Chr. 4  | 27995462 | 28001390 | 5929  | 99.5  | 0.0 |
| <i>ALK</i>     | 1              | <i>ONIVA06G09520</i> | Chr. 6  | 6979112  | 6984349  | 5238  | 99.4  | 0.0 |
| <i>DPEI</i>    | <b>UNKNOWN</b> |                      |         |          |          |       |       |     |
| <i>GBSSII</i>  | 2              | <i>ONIVA07G09560</i> | Chr. 7  | 9331482  | 9338655  | 7174  | 99.8  | 0.0 |
| <i>ISA</i>     | 2              | <i>ONIVA01G02600</i> | Chr. 1  | 1822103  | 1830976  | 8874  | 99.7  | 0.0 |
| <i>PUL</i>     | 3              | <i>ONIVA08G18600</i> | Chr. 8  | 20035949 | 20048691 | 12743 | 99.8  | 0.0 |
| <i>SBE1</i>    | 6              | <i>ONIVA06G30960</i> | Chr. 6  | 28851472 | 28859303 | 7832  | 99.8  | 0.0 |
| <i>SBE3</i>    | 1              | <i>ONIVA02G20920</i> | Chr. 2  | 19160312 | 19171267 | 10956 | 99.8  | 0.0 |
| <i>SSI</i>     | 1              | <i>ONIVA06G20230</i> | Chr. 6  | 18799660 | 18806464 | 6805  | 99.4  | 0.0 |
| <i>SSII 1</i>  | 3              | <i>ONIVA10G10320</i> | Chr. 10 | 11413747 | 11424234 | 10488 | 99.7  | 0.0 |
| <i>SSII 2</i>  | 2              | <i>ONIVA06G04720</i> | Chr. 6  | 3161289  | 3166670  | 5391  | 99.5  | 0.0 |
| <i>SSIII 1</i> | 2              | <i>ONIVA04G24880</i> | Chr. 4  | 24741542 | 24749237 | 7696  | 99.9  | 0.0 |
| <i>SSIII 2</i> | 2              | <i>ONIVA08G05260</i> | Chr. 8  | 4445515  | 4458770  | 13256 | 99.7  | 0.0 |
| <i>SSIV 1</i>  | 3              | <i>ONIVA01G33370</i> | Chr. 1  | 29128063 | 29136375 | 8313  | 99.9  | 0.0 |
| <i>SSIV 2</i>  | 1              | <i>ONIVA05G24550</i> | Chr. 5  | 24014997 | 24023064 | 8040  | 99.7  | 0.0 |
| <i>Wx</i>      | 1              | <i>ONIVA06G02500</i> | Chr. 6  | 1715144  | 1719189  | 4046  | 99.9  | 0.0 |
| <i>AGPL1</i>   | 1              | <i>OGLUM05G28600</i> | Chr. 5  | 29490471 | 29492029 | 3389  | 99.7  | 0.0 |
| <i>AGPL3</i>   | 1              | <i>OGLUM03G32900</i> | Chr. 3  | 31084033 | 31088270 | 4238  | 99.6  | 0.0 |
| <i>AGPL4</i>   | 1              | <i>OGLUM07G07800</i> | Chr. 7  | 7504668  | 7510317  | 5650  | 99.6  | 0.0 |
| <i>AGPS2a</i>  | 1              | <i>OGLUM08G12560</i> | Chr. 8  | 13673152 | 13677206 | 4055  | 99.8  | 0.0 |
| <i>ALK</i>     | 1              | <i>OGLUM06G08830</i> | Chr. 6  | 6894230  | 6899271  | 5050  | 99.5  | 0.0 |
| <i>DPEI</i>    | 2              | <i>OGLUM07G22950</i> | Chr. 7  | 24895289 | 24899871 | 4583  | 99.7  | 0.0 |
| <i>GBSSII</i>  | 2              | <i>OGLUM07G10960</i> | Chr. 7  | 12170159 | 12177340 | 7182  | 99.7  | 0.0 |

|         |   |                 |         |          |          |       |      |     |
|---------|---|-----------------|---------|----------|----------|-------|------|-----|
| ISA     | 1 | OGLUM08G22090   | Chr. 8  | 24554177 | 24560987 | 6811  | 99.9 | 0.0 |
| PUL     | 3 | OGLUM04G01860   | Chr. 4  | 2886872  | 2900509  | 13638 | 98.5 | 0.0 |
| SBE1    | 7 | OGLUM06G29370   | Chr. 6  | 31128403 | 31137352 | 8950  | 99.8 | 0.0 |
| SBE3    | 1 | OGLUM02G19180   | Chr. 2  | 20189625 | 20200539 | 10915 | 99.7 | 0.0 |
| SSI     | 1 | OGLUM06G04130   | Chr. 6  | 2892170  | 2898982  | 6821  | 99.1 | 0.0 |
| SSII 1  | 2 | OGLUM10G10900   | Chr. 10 | 14772075 | 14780343 | 8269  | 97.4 | 0.0 |
| SSII 2  | 2 | OGLUM02G32940   | Chr. 2  | 32627141 | 32631778 | 4638  | 99.5 | 0.0 |
| SSIII 1 | 3 | OGLUM04G25800   | Chr. 4  | 28951767 | 28958958 | 7192  | 98.0 | 0.0 |
| SSIII 2 | 2 | OGLUM08G05570   | Chr. 8  | 4670325  | 4683755  | 13441 | 99.4 | 0.0 |
| SSIV 1  | 2 | OGLUM01G33230   | Chr. 1  | 32640551 | 32648862 | 8312  | 99.5 | 0.0 |
| SSIV 2  | 2 | OGLUM05G25180   | Chr. 5  | 26994912 | 27002552 | 7641  | 98.2 | 0.0 |
| Wx      | 2 | OGLUM06G02020   | Chr. 6  | 1469264  | 1474035  | 4772  | 99.9 | 0.0 |
| AGPL1   | 1 | ORGLA05G0234700 | Chr. 5  | 22419555 | 22421766 | 3384  | 98.9 | 0.0 |
| AGPL3   | 1 | ORGLA03G0301700 | Chr. 3  | 27225984 | 27230182 | 4199  | 99.7 | 0.0 |
| AGPL4   | 1 | ORGLA07G0073000 | Chr. 7  | 6872607  | 6877182  | 4516  | 99.8 | 0.0 |
| AGPS2a  | 1 | ORGLA08G0104300 | Chr. 8  | 11519446 | 11523524 | 5891  | 99.5 | 0.0 |
| ALK     | 1 | ORGLA06G0078600 | Chr. 6  | 6002051  | 6006473  | 4423  | 99.6 | 0.0 |
| DPEI    | 1 | ORGLA07G0179000 | Chr. 7  | 18641028 | 18645164 | 4137  | 98.2 | 0.0 |
| GBSSII  | 1 | ORGLA07G0097800 | Chr. 7  | 10557492 | 10561434 | 3943  | 99.5 | 0.0 |
| ISA     | 1 | ORGLA08G0184300 | Chr. 8  | 19624422 | 19631228 | 6807  | 99.7 | 0.0 |
| PUL     | 1 | ORGLA04G0016300 | Chr. 4  | 2098830  | 2109127  | 10308 | 99.6 | 0.0 |
|         | 1 | ORGLA06G0243400 | Chr. 6  | 23629078 | 23642103 | 11836 | 99.4 | 0.0 |
| SBE1    | 1 | ORGLA06G0237000 | Chr. 6  | 23121600 | 23127808 | 6209  | 99.6 | 0.0 |
| SBE3    | 1 | ORGLA02G0162800 | Chr. 2  | 15767001 | 15777902 | 10902 | 99.8 | 0.0 |
| SSI     | 1 | ORGLA06G0037300 | Chr. 6  | 2672463  | 2679274  | 6812  | 99.5 | 0.0 |
| SSII 1  | 1 | ORGLA10G0098400 | Chr. 10 | 12560982 | 12568108 | 7127  | 99.8 | 0.0 |
| SSII 2  | 1 | ORGLA02G0278400 | Chr. 2  | 25119935 | 25124140 | 4206  | 99.5 | 0.0 |
| SSIII 1 | 1 | ORGLA04G0229100 | Chr. 4  | 23494796 | 23501988 | 7193  | 99.7 | 0.0 |
| SSIII 2 | 1 | ORGLA08G0045500 | Chr. 8  | 3902326  | 3913414  | 11089 | 99.7 | 0.0 |
| SSIV 1  | 1 | ORGLA01G0239700 | Chr. 1  | 21752449 | 21760765 | 8317  | 99.6 | 0.0 |
| SSIV 2  |   | UNKNOWN         |         |          |          |       |      |     |
| Wx      | 1 | ORGLA06G0020500 | Chr. 6  | 1582446  | 1585771  | 3326  | 99.6 | 0.0 |
| AGPL1   | 1 | OBART05G27050   | Chr. 5  | 23324094 | 23326305 | 3384  | 99.8 | 0.0 |
| AGPL3   | 1 | OBART03G33230   | Chr. 3  | 27626346 | 27630535 | 4190  | 99.7 | 0.0 |
| AGPL4   | 1 | OBART07G08590   | Chr. 7  | 7013571  | 7017866  | 4296  | 99.8 | 0.0 |
| AGPS2a  | 2 | OBART08G11760   | Chr. 8  | 11861898 | 11867788 | 5891  | 99.3 | 0.0 |
| ALK     | 1 | OBART06G08250   | Chr. 6  | 6050736  | 6055714  | 4979  | 99.6 | 0.0 |
| DPEI    | 2 | OBART07G22910   | Chr. 7  | 20754611 | 20758640 | 4030  | 98.2 | 0.0 |
| GBSSII  | 2 | OBART07G11410   | Chr. 7  | 10578751 | 10585992 | 7142  | 99.5 | 0.0 |
| ISA     | 1 | OBART08G20830   | Chr. 8  | 20404034 | 20410832 | 6699  | 99.7 | 0.0 |
| PUL     | 1 | OBART04G02210   | Chr. 4  | 2180683  | 2193763  | 13081 | 99.6 | 0.0 |
| SBE1    | 2 | OBART06G27990   | Chr. 6  | 25397160 | 25403370 | 6211  | 99.6 | 0.0 |
| SBE3    | 1 | OBART02G18870   | Chr. 2  | 17066878 | 17077468 | 10591 | 99.7 | 0.0 |

|                |                |                      |         |          |          |       |      |          |
|----------------|----------------|----------------------|---------|----------|----------|-------|------|----------|
| <i>SSI</i>     | 1              | <i>OBART06G04010</i> | Chr. 6  | 2754467  | 2761274  | 6808  | 99.4 | 0.0      |
| <i>SSII 1</i>  | 2              | <i>OBART10G11180</i> | Chr. 10 | 12596913 | 12604730 | 7818  | 99.8 | 0.0      |
| <i>SSII 2</i>  | 1              | <i>OBART02G32300</i> | Chr. 2  | 27493261 | 27497466 | 4206  | 99.5 | 0.0      |
| <i>SSIII 1</i> | 1              | <i>OBART04G26440</i> | Chr. 4  | 24614479 | 24621672 | 7194  | 99.6 | 0.0      |
| <i>SSIII 2</i> | 3              | <i>OBART08G05320</i> | Chr. 8  | 4222533  | 4234438  | 11906 | 99.6 | 0.0      |
| <i>SSIV 1</i>  | 2              | <i>OBART01G29190</i> | Chr. 1  | 25014283 | 25022599 | 8317  | 99.6 | 0.0      |
| <i>SSIV 2</i>  | 4              | <i>OBART05G23810</i> | Chr. 5  | 21216867 | 21225276 | 8310  | 99.5 | 0.0      |
| <i>Wx</i>      | 1              | <i>OBART06G02000</i> | Chr. 6  | 1521439  | 1525491  | 4094  | 99.6 | 0.0      |
| <i>AGPL1</i>   | 4              | <i>OMERI05G23130</i> | Chr. 5  | 25687807 | 25689281 | 7452  | 98.6 | 0.0      |
| <i>AGPL3</i>   | 3              | <i>OMERI03G29830</i> | Chr. 3  | 31404907 | 31420237 | 15331 | 98.7 | 0.0      |
| <i>AGPL4</i>   | 1              | <i>OMERI07G06990</i> | Chr. 7  | 7300131  | 7308247  | 8117  | 99.8 | 0.0      |
| <i>AGPS2a</i>  | 1              | <i>OMERI09G03640</i> | Chr. 9  | 5815979  | 5826226  | 10248 | 87.4 | 4.3E-71  |
| <i>ALK</i>     | 1              | <i>OMERI06G09850</i> | Chr. 6  | 8591311  | 8596588  | 5278  | 98.6 | 0.0      |
| <i>DPEI</i>    | 1              | <i>OMERI07G19310</i> | Chr. 7  | 22508514 | 22522342 | 13829 | 99.0 | 0.0      |
| <i>GBSSII</i>  | <b>UNKNOWN</b> |                      |         |          |          |       |      |          |
| <i>ISA</i>     | 1              | <i>OMERI02G01830</i> | Chr. 2  | 1481268  | 1491073  | 9806  | 99.6 | 0.0      |
| <i>PUL</i>     | 3              | <i>OMERI04G02160</i> | Chr. 4  | 3050487  | 3064210  | 13418 | 98.5 | 0.0      |
| <i>SBE1</i>    | 6              | <i>OMERI06G27930</i> | Chr. 6  | 31435504 | 31444602 | 9099  | 99.4 | 0.0      |
| <i>SBE3</i>    | 1              | <i>OMERI02G18870</i> | Chr. 2  | 20742387 | 20758950 | 16564 | 99.0 | 0.0      |
| <i>SSI</i>     | 1              | <i>OMERI06G04610</i> | Chr. 6  | 3672873  | 3680742  | 7870  | 97.1 | 0.0      |
| <i>SSII 1</i>  | 2              | <i>OMERI04G07060</i> | Chr. 4  | 11369715 | 11377827 | 8113  | 98.7 | 0.0      |
| <i>SSII 2</i>  | 1              | <i>OMERI06G09850</i> | Chr. 6  | 8591311  | 8596588  | 5278  | 88.7 | 1.3E-142 |
| <i>SSIII 1</i> | 1              | <i>OMERI04G21470</i> | Chr. 4  | 26281268 | 26296875 | 15151 | 97.9 | 0.0      |
|                | 1              | <i>OMERI04G21490</i> | Chr. 4  | 26300044 | 26307350 | 7307  | 97.9 | 0.0      |
| <i>SSIII 2</i> | 1              | <i>OMERI08G05080</i> | Chr. 8  | 4840603  | 4852759  | 12157 | 99.5 | 0.0      |
| <i>SSIV 1</i>  | 1              | <i>OMERI01G26630</i> | Chr. 1  | 27952587 | 27955762 | 3176  | 97.1 | 0.0      |
|                | 4              | <i>OMERI01G26980</i> | Chr. 1  | 28230264 | 28240799 | 10536 | 97.1 | 0.0      |
| <i>SSIV 2</i>  | 1              | <i>OMERI05G21310</i> | Chr. 5  | 24160650 | 24175895 | 14194 | 99.6 | 0.0      |
| <i>Wx</i>      | 3              | <i>OMERI06G01920</i> | Chr. 6  | 1676732  | 1682574  | 5235  | 97.9 | 0.0      |
| <i>AGPL1</i>   | 1              | <i>OPUNC05G24670</i> | Chr. 5  | 30120865 | 30121813 | 3375  | 96.7 | 0.0      |
| <i>AGPL3</i>   | 1              | <i>OPUNC03G30430</i> | Chr. 3  | 32831814 | 32836265 | 4452  | 95.3 | 0.0      |
| <i>AGLP4</i>   | 1              | <i>OPUNC07G08120</i> | Chr. 7  | 8462242  | 8467841  | 5600  | 94.3 | 0.0      |
| <i>AGPS2a</i>  | 2              | <i>OPUNC08G10720</i> | Chr. 8  | 15575237 | 15580527 | 5291  | 97.6 | 0.0      |
| <i>ALK</i>     | 1              | <i>OPUNC06G08000</i> | Chr. 6  | 6492378  | 6497173  | 4796  | 96.9 | 0.0      |
| <i>DPEI</i>    | 1              | <i>OPUNC07G21530</i> | Chr. 7  | 27721637 | 27726637 | 5001  | 89.0 | 2.0E-135 |
| <i>GBSSII</i>  | 1              | <i>OPUNC07G10360</i> | Chr. 7  | 13869752 | 13873662 | 3911  | 96.1 | 0.0      |
| <i>ISA</i>     | 1              | <i>OPUNC08G18890</i> | Chr. 8  | 27058634 | 27065585 | 6952  | 95.9 | 0.0      |
| <i>PUL</i>     | 1              | <i>OPUNC04G02180</i> | Chr. 4  | 3369443  | 3383422  | 13980 | 95.6 | 0.0      |
| <i>SBE1</i>    | 4              | <i>OPUNC06G25520</i> | Chr. 6  | 34223277 | 34229751 | 6475  | 97.5 | 0.0      |
| <i>SBE3</i>    | 2              | <i>OPUNC02G16910</i> | Chr. 2  | 21616213 | 21627157 | 10945 | 94.1 | 0.0      |
| <i>SSI</i>     | 2              | <i>OPUNC06G03820</i> | Chr. 6  | 2602107  | 2608648  | 6542  | 97.9 | 0.0      |
| <i>SSII 1</i>  | 3              | <i>OPUNC10G09440</i> | Chr. 10 | 18391785 | 18399027 | 7243  | 96.2 | 0.0      |
| <i>SSII 2</i>  | 1              | <i>OPUNC02G29850</i> | Chr. 2  | 34702141 | 34710291 | 8151  | 98.5 | 0.0      |

|                |   |                         |         |          |          |       |      |          |
|----------------|---|-------------------------|---------|----------|----------|-------|------|----------|
| <i>SSIII 1</i> | 1 | <i>OPUNC04G23440</i>    | Chr. 4  | 30084234 | 30092699 | 8466  | 95.1 | 0.0      |
| <i>SSIII 2</i> | 1 | <i>OPUNC08G05170</i>    | Chr. 8  | 4642721  | 4654350  | 11630 | 97.1 | 0.0      |
| <i>SSIV 1</i>  | 1 | <i>OPUNC01G29020</i>    | Chr. 1  | 32623724 | 32631889 | 8166  | 94.4 | 0.0      |
| <i>SSIV 2</i>  | 1 | <i>OPUNC05G21230</i>    | Chr. 5  | 27633570 | 27640939 | 7370  | 96.8 | 0.0      |
| <i>Wx</i>      | 1 | <i>OPUNC06G01860</i>    | Chr. 6  | 1254773  | 1258390  | 3618  | 96.1 | 5.4E-170 |
| <i>AGPL1</i>   | 1 | <i>OB05G34620</i>       | Chr. 5  | 19404719 | 19405022 | 3789  | 93.4 | 2.1E-122 |
| <i>AGPL3</i>   | 1 | <i>OB03G40320</i>       | Chr. 3  | 24403484 | 24407693 | 4210  | 89.1 | 1.1E-74  |
| <i>AGPL4</i>   | 1 | <i>OB07G16320</i>       | Chr. 7  | 4817190  | 4823741  | 6552  | 94.0 | 1.3E-71  |
| <i>AGPS2a</i>  | 1 | <i>OB08G20190</i>       | Chr. 8  | 9379642  | 9384572  | 6348  | 92.4 | 1.6E-126 |
| <i>ALK</i>     | 1 | <i>OB06G17800</i>       | Chr. 6  | 5218731  | 5224167  | 5437  | 94.2 | 0.0      |
| <i>DPEI</i>    |   | <b>UNKNOWN</b>          |         |          |          |       |      |          |
| <i>GBSSII</i>  | 1 | <i>OB0037G10230</i>     | Chr. 7  |          |          | 4776  | 90.5 | 2.9E-159 |
| <i>ISA</i>     | 1 | <i>OB08G27630</i>       | Chr. 8  | 16176164 | 16184129 | 7966  | 89.5 | 1.2E-93  |
| <i>PUL</i>     | 1 | <i>OB04G11820</i>       | Chr. 4  | 1712825  | 1725559  | 12735 | 90.1 | 3.1E-98  |
| <i>SBE1</i>    | 1 | <i>OB06G35740</i>       | Chr. 6  | 21520777 | 21526573 | 5797  | 94.4 | 0.0      |
| <i>SBE3</i>    | 1 | <i>OB02G26660</i>       | Chr. 2  | 13948443 | 13958806 | 10364 | 88.7 | 1.6E-78  |
| <i>SSI</i>     | 1 | <i>OB06G13760</i>       | Chr. 6  | 2200850  | 2208525  | 7462  | 93.7 | 0.0      |
| <i>SSII 1</i>  | 1 | <i>OB10G18500</i>       | Chr. 10 | 8851531  | 8863293  | 8050  | 93.6 | 0.0      |
| <i>SSII 2</i>  | 1 | <i>OB02G39280</i>       | Chr. 2  | 23179404 | 23191306 | 11218 | 95.1 | 0.0      |
| <i>SSIII 1</i> | 1 | <i>OB04G32800</i>       | Chr. 4  | 18435317 | 18443066 | 7750  | 91.6 | 0.0      |
| <i>SSIII 2</i> | 1 | <i>OB08G15430</i>       | Chr. 8  | 3676339  | 3688697  | 12359 | 92.7 | 0.0      |
| <i>SSIV 1</i>  | 1 | <i>OB01G38130</i>       | Chr. 1  | 22754355 | 22763315 | 8961  | 90.3 | 0.0      |
| <i>SSIV 2</i>  | 1 | <i>OB05G31380</i>       | Chr. 5  | 17372953 | 17379376 | 6424  | 92.5 | 0.0      |
| <i>Wx</i>      | 1 | <i>OB06G11980</i>       | Chr. 6  | 1175992  | 1178897  | 2915  | 94.9 | 1.1E-108 |
| <i>AGPL1</i>   | 1 | <i>KN538814.1_FG015</i> | Chr. 5  | 24862240 | 24865615 | 3376  | 99.4 | 0.0      |
| <i>AGPL3</i>   | 1 | <i>KN539195.1_FG019</i> | Chr. 3  | 37651614 | 37655808 | 6268  | 99.2 | 0.0      |
| <i>AGPL4</i>   | 1 | <i>KN538938.1_FG006</i> | Chr. 3  | 24152577 | 24156527 | 4281  | 99.1 | 0.0      |
| <i>AGPS2a</i>  | 1 | <i>KN542860.1_FG001</i> | Chr. 8  | 12526401 | 12529162 | 5564  | 99.3 | 0.0      |
| <i>ALK</i>     | 1 | <i>KN538722.1_FG043</i> | Chr. 6  | 8195027  | 8198855  | 3964  | 99.6 | 0.0      |
| <i>DPEI</i>    | 1 | <i>KN538920.1_FG009</i> | Chr. 7  | 22602297 | 22605871 | 3575  | 98.2 | 0.0      |
| <i>GBSSII</i>  | 1 | <i>KN539544.1_FG005</i> | Chr. 7  | 12091388 | 12095326 | 3939  | 99.0 | 0.0      |
| <i>ISA</i>     | 1 | <i>KN538852.1_FG008</i> | Chr. 8  | 21633299 | 21637060 | 6624  | 98.4 | 0.0      |
| <i>PUL</i>     | 1 | <i>KN541174.1_FG002</i> | Chr. 4  | 1902073  | 1904954  | 8157  | 99.0 | 0.0      |
| <i>SBE1</i>    | 1 | <i>KN538785.1_FG052</i> | Chr. 6  | 30095026 | 30100130 | 6120  | 99.5 | 0.0      |
| <i>SBE3</i>    | 1 | <i>KN539270.1_FG007</i> | Chr. 2  | 18668529 | 18679912 | 10831 | 99.3 | 0.0      |
| <i>SSI</i>     | 1 | <i>KN538819.1_FG032</i> | Chr. 6  | 4298110  | 4304233  | 6798  | 99.4 | 0.0      |
| <i>SSII 1</i>  | 1 | <i>KN538870.1_FG026</i> | Chr. 10 | 11500196 | 11503685 | 9557  | 97.8 | 0.0      |
| <i>SSII 2</i>  | 1 | <i>KN539373.1_FG011</i> | Chr. 2  | 31221350 | 31225771 | 11863 | 99.2 | 0.0      |
| <i>SSIII 1</i> | 1 | <i>KN539225.1_FG011</i> | Chr. 4  | 28535423 | 28542610 | 7198  | 98.0 | 0.0      |
| <i>SSIII 2</i> | 1 | <i>KN539976.1_FG005</i> | Chr. 8  | 4385551  | 4396060  | 10509 | 99.3 | 0.0      |
| <i>SSIV 1</i>  | 1 | <i>KN538890.1_FG010</i> | Chr. 1  | 25879105 | 25889274 | 11120 | 97.3 | 0.0      |
| <i>SSIV 2</i>  | 1 | <i>KN542368.1_FG001</i> | Chr. 9  | 3065269  | 3071676  | 8426  | 98.6 | 0.0      |
| <i>Wx</i>      | 1 | <i>KN539033.1_FG002</i> | Chr. 6  | 2346028  | 2348767  | 3075  | 99.7 | 0.0      |

|         |   |               |         |          |          |       |      |          |
|---------|---|---------------|---------|----------|----------|-------|------|----------|
| AGPL1   | 1 | LPERR05G22710 | Chr. 5  | 19941516 | 19941853 | 3365  | 90.2 | 1.2E-111 |
| AGPL3   | 3 | LPERR03G27770 | Chr. 3  | 24280936 | 24285189 | 4254  | 94.8 | 1.9E-79  |
| AGPL4   | 1 | LPERR07G07430 | Chr. 7  | 6441935  | 6453460  | 11426 | 93.8 | 8.7E-76  |
| AGPS2a  | 2 | LPERR08G09730 | Chr. 8  | 9674267  | 9674615  | 5439  | 94.6 | 1.4E-151 |
| ALK     | 1 | LPERR06G07610 | Chr. 6  | 5565368  | 5569799  | 4432  | 92.1 | 0.0      |
| DPEI    | 1 | LPERR07G19870 | Chr. 7  | 19361114 | 19361592 | 4173  | 93.5 | 0.0      |
| GBSSII  | 1 | LPERR05G07400 | Chr. 5  | 6809691  | 6818650  | 8960  | 91.0 | 9.7E-107 |
| ISA     | 2 | LPERR08G17590 | Chr. 8  | 17935360 | 17943243 | 7884  | 89.6 | 2.1E-98  |
| PUL     | 5 | LPERR04G01450 | Chr. 4  | 1637441  | 1651731  | 14299 | 92.5 | 2.4E-151 |
| SBE1    | 1 | LPERR06G23440 | Chr. 6  | 20752621 | 20758851 | 6231  | 94.6 | 0.0      |
| SBE3    | 1 | LPERR02G15110 | Chr. 2  | 13299407 | 13312765 | 13359 | 91.3 | 3.8E-144 |
| SSI     | 1 | LPERR06G03680 | Chr. 6  | 2514855  | 2524553  | 9699  | 93.2 | 8.9E-98  |
| SSII 1  | 3 | LPERR10G07960 | Chr. 10 | 9684239  | 9694403  | 10165 | 95.9 | 0.0      |
| SSII 2  | 1 | LPERR02G26450 | Chr. 2  | 22543587 | 22548109 | 4523  | 94.0 | 0.0      |
|         | 1 | LPERR06G07610 | Chr. 6  | 5565368  | 5569799  | 4432  | 89.1 | 5.4E-166 |
| SSIII 1 | 1 | LPERR04G21480 | Chr. 4  | 20045750 | 20053049 | 7300  | 90.6 | 0.0      |
| SSIII 2 | 1 | LPERR08G05100 | Chr. 8  | 4147149  | 4157275  | 10127 | 91.3 | 0.0      |
| SSIV 1  | 5 | LPERR01G25000 | Chr. 1  | 21819891 | 21835575 | 15685 | 89.9 | 0.0      |
| SSIV 2  | 2 | LPERR05G19650 | Chr. 5  | 17931037 | 17938653 | 7610  | 91.7 | 0.0      |
| Wx      | 2 | LPERR06G01820 | Chr. 6  | 1223031  | 1227394  | 4364  | 92.5 | 8.9e-94  |
|         | 1 | LPERR06G01810 | Chr. 7  | 1218230  | 1221309  | 3080  | 92.0 | 1.3E-89  |
