# Supplementary figures and images for: Starch Synthesis-Related Genes (SSRG) Evolution in the Genus Oryza
Source: MDPI journal article supplement (doi:10.3390/plants10061057), 2021-05-25

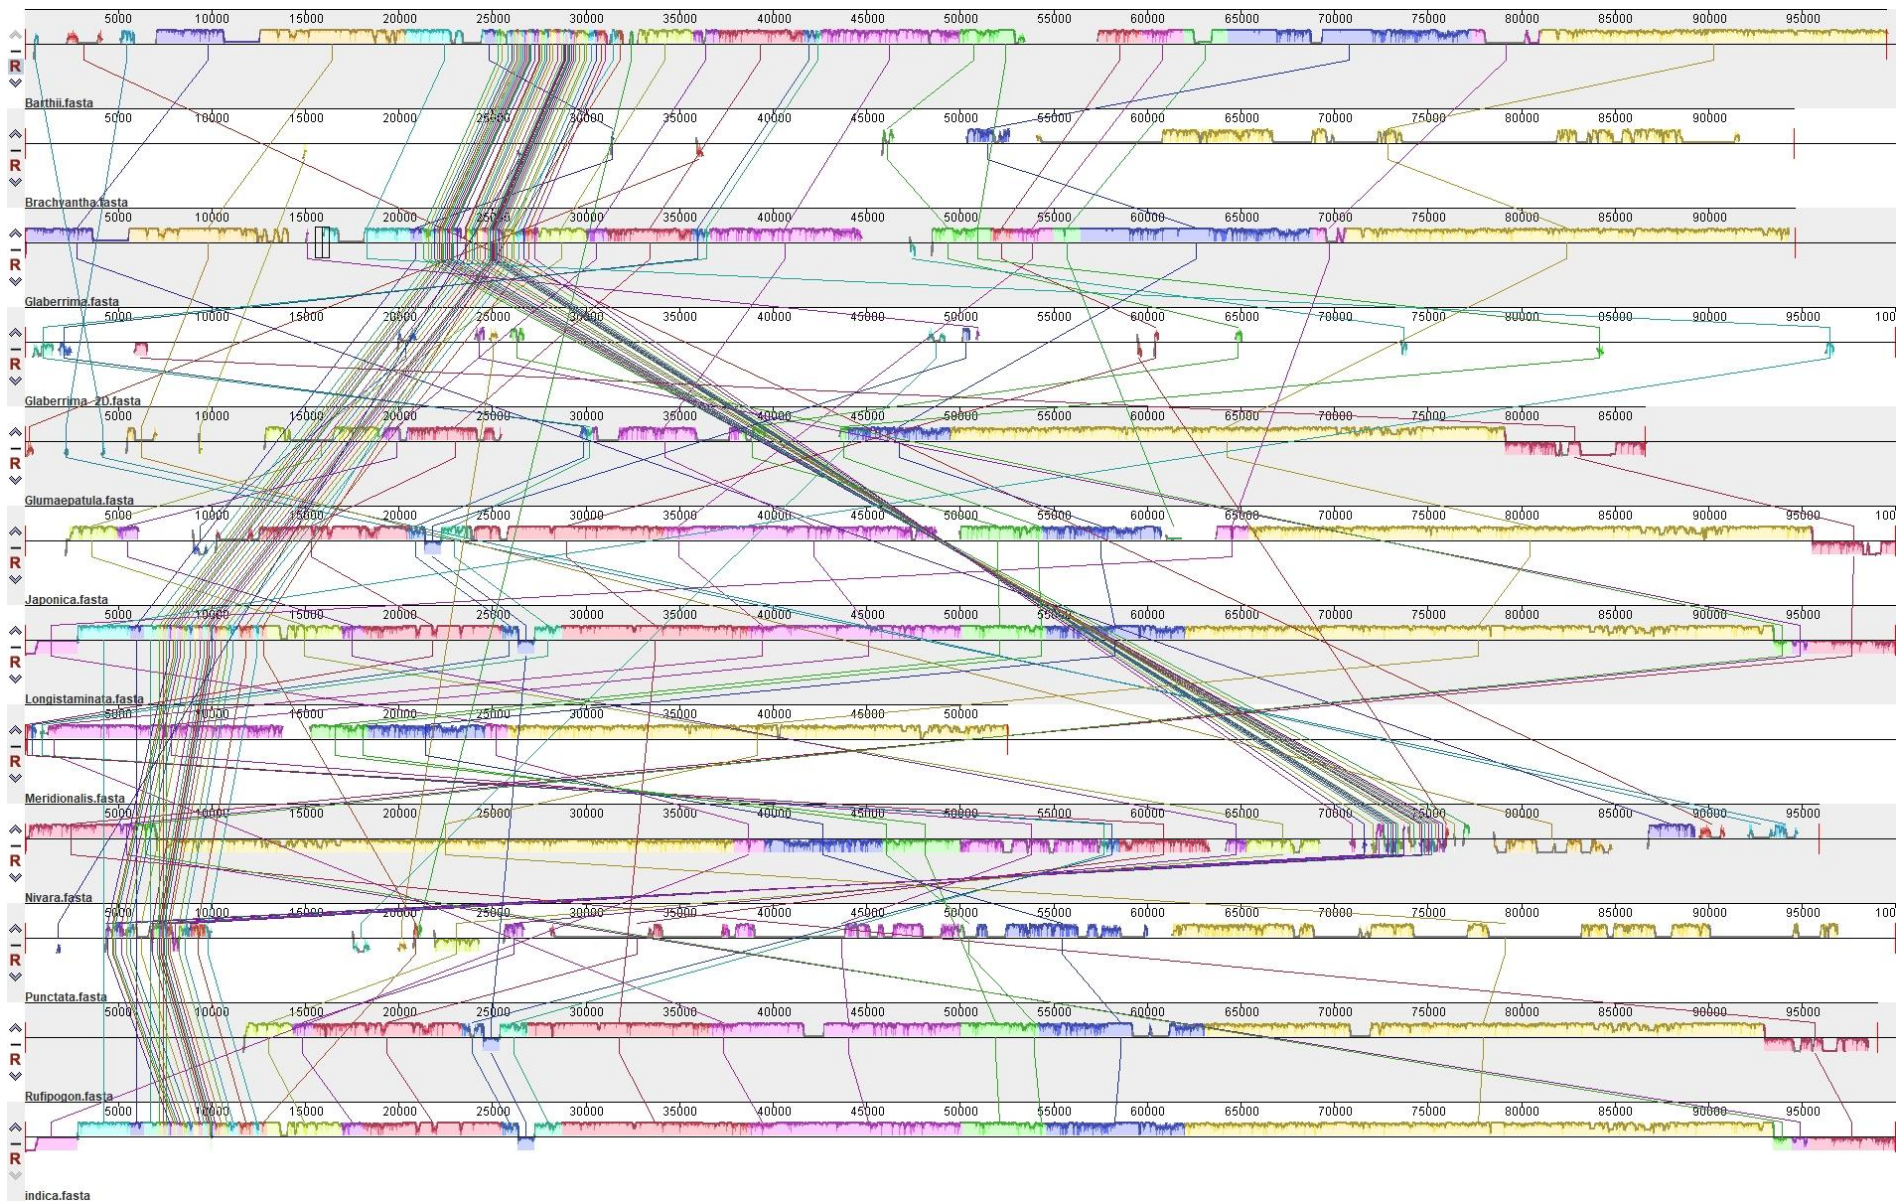

indica.fasta

Supplement: s1 [file s1]

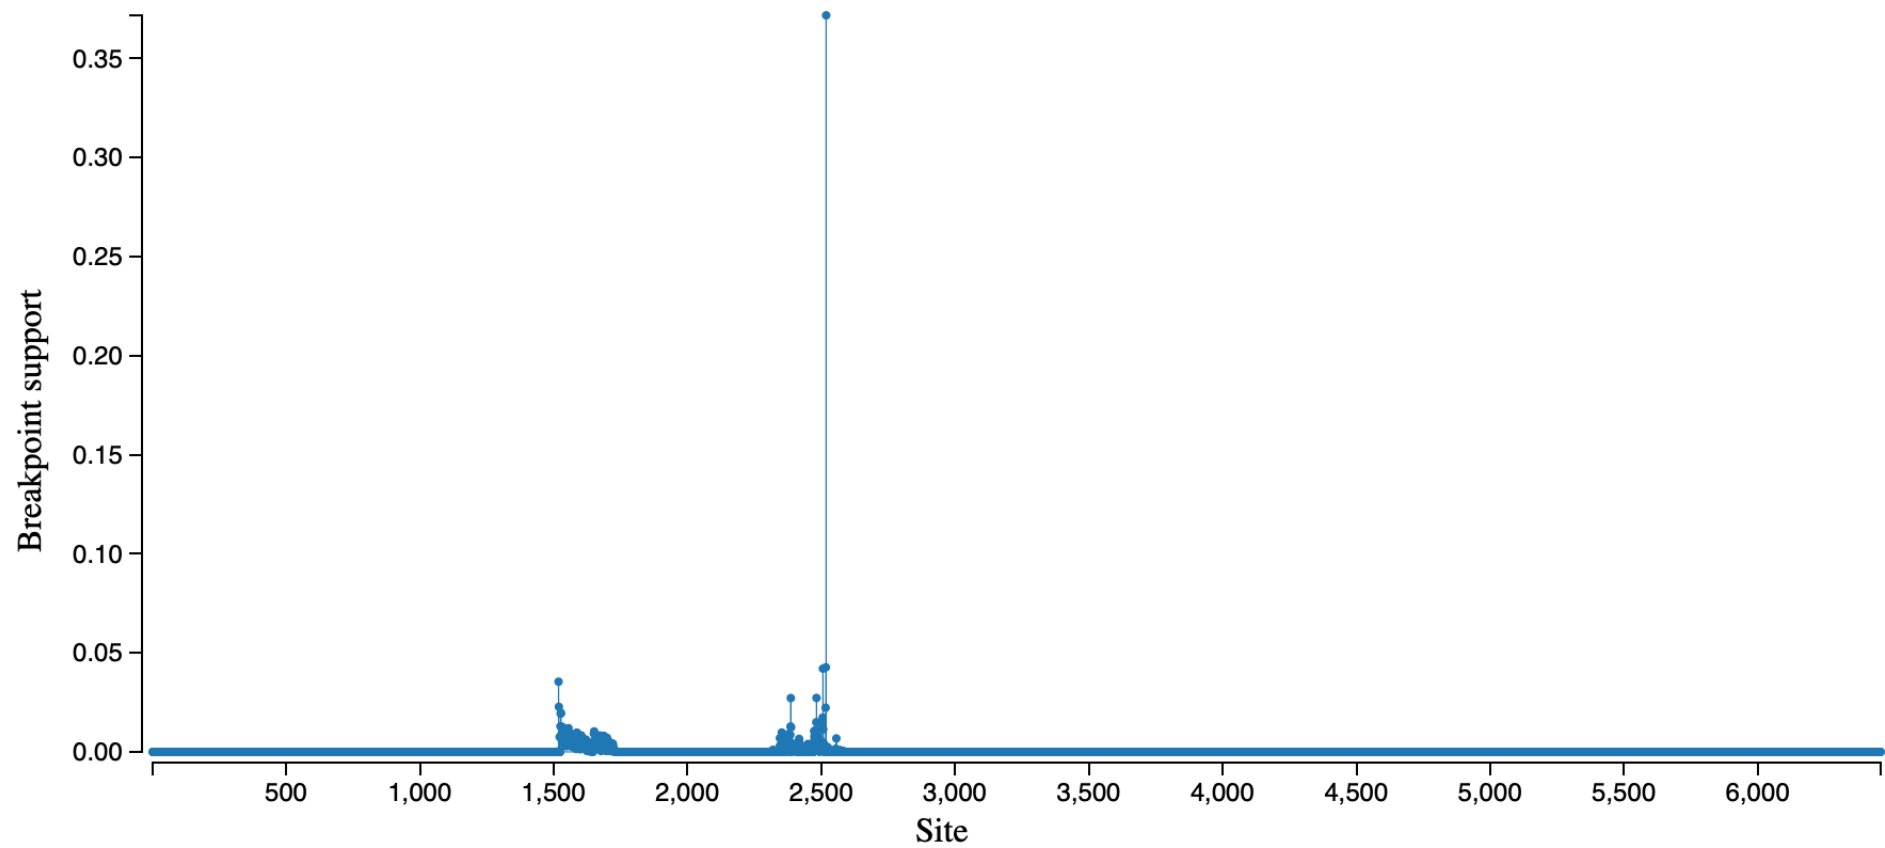

Supplement: s1 [file s1]

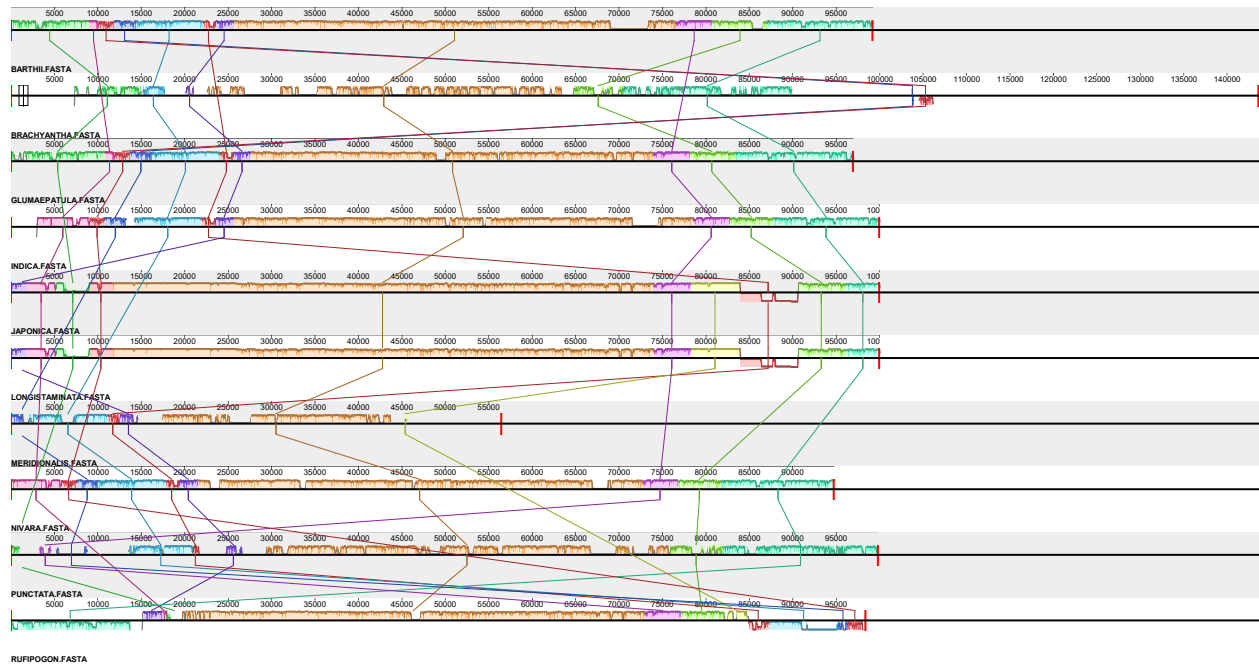

Supplement: s1 [file s1]

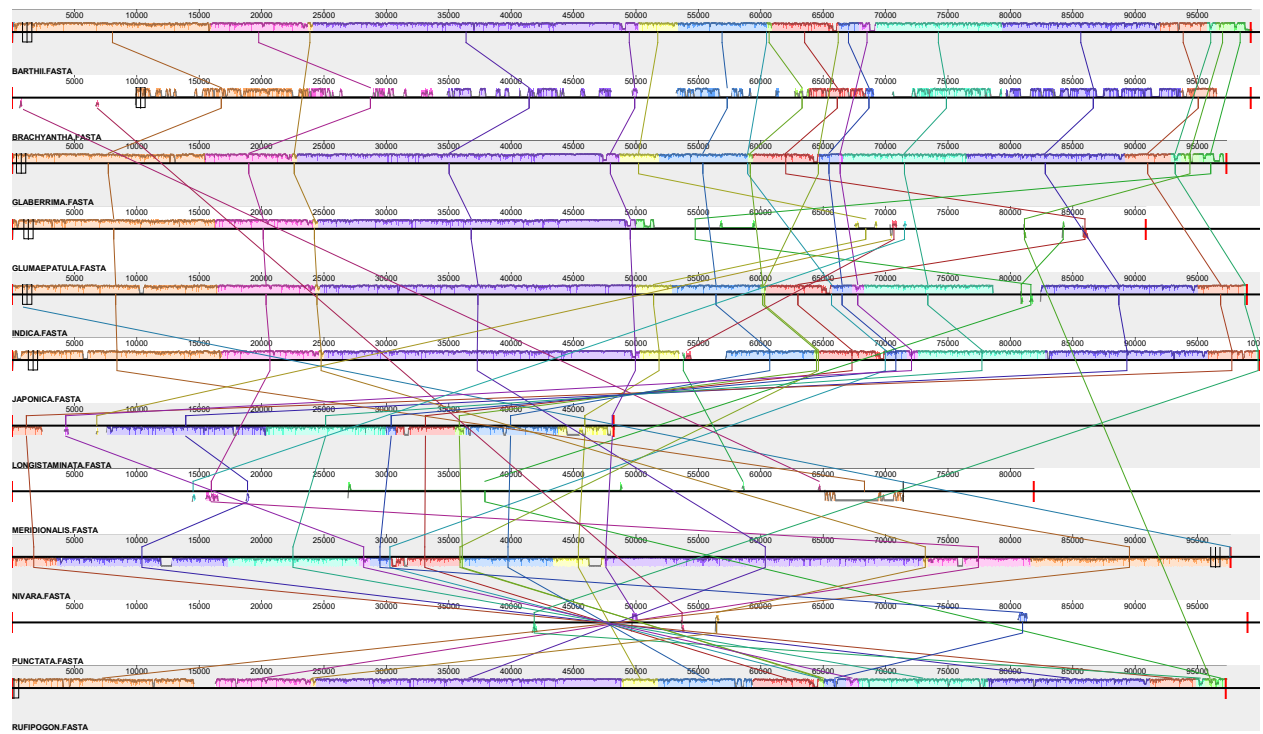

Supplement: s1 [file s1]

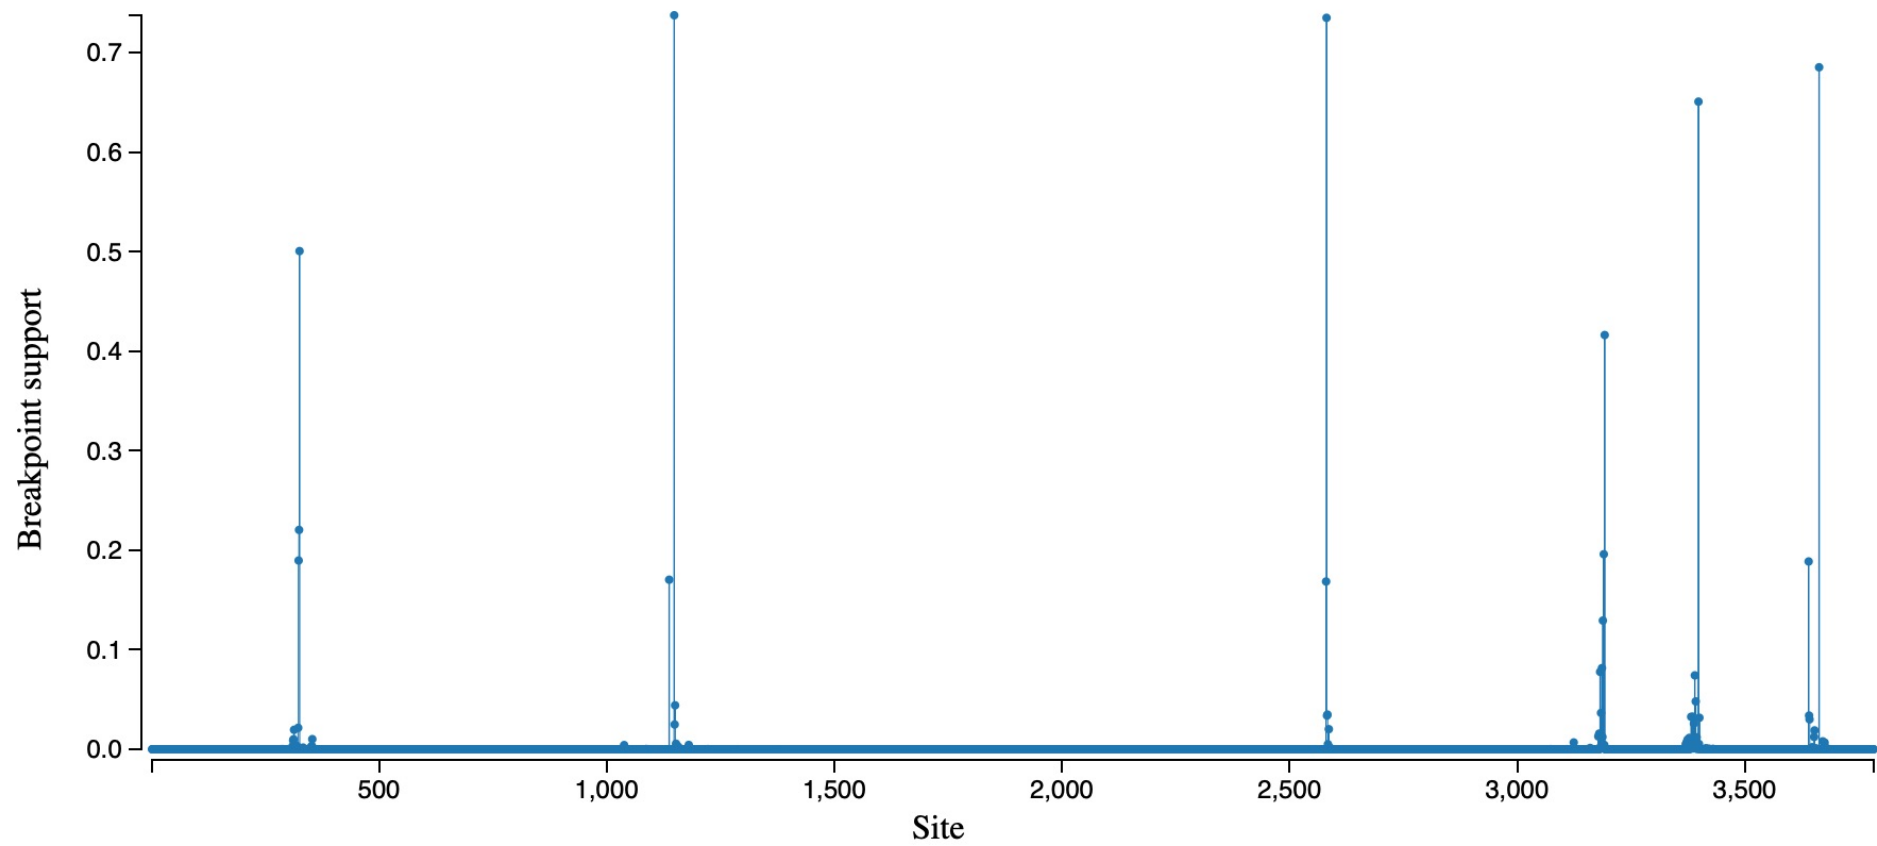

Supplement: s1 [file s1]

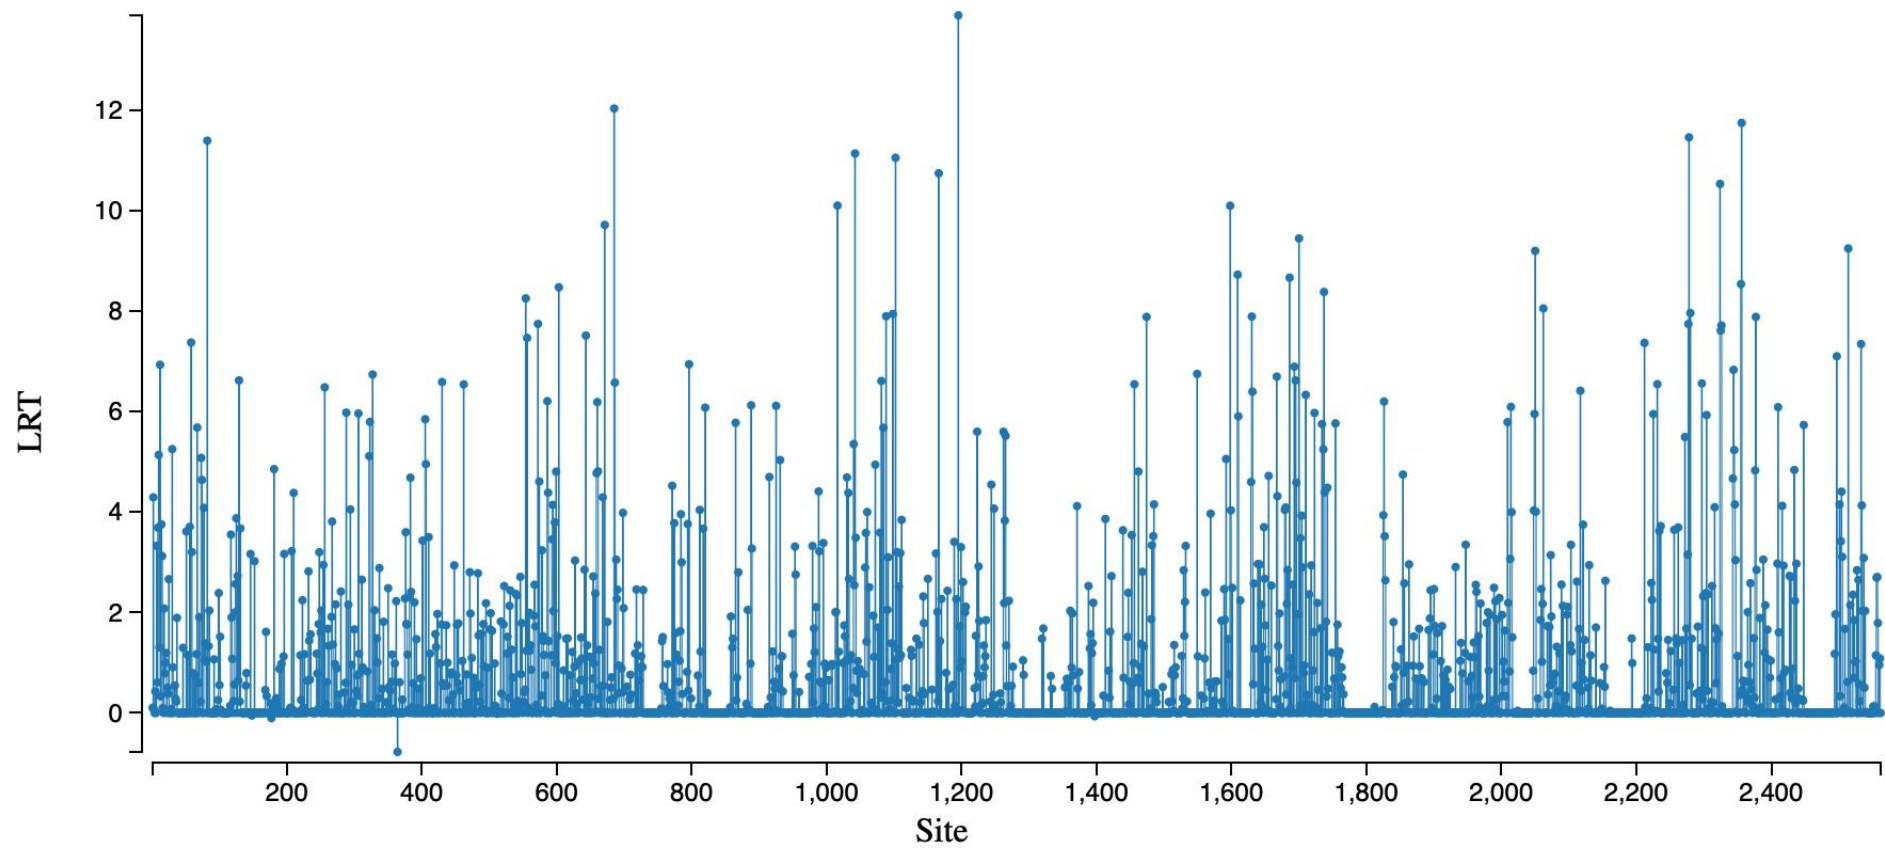

Supplement: s1 [file s1]

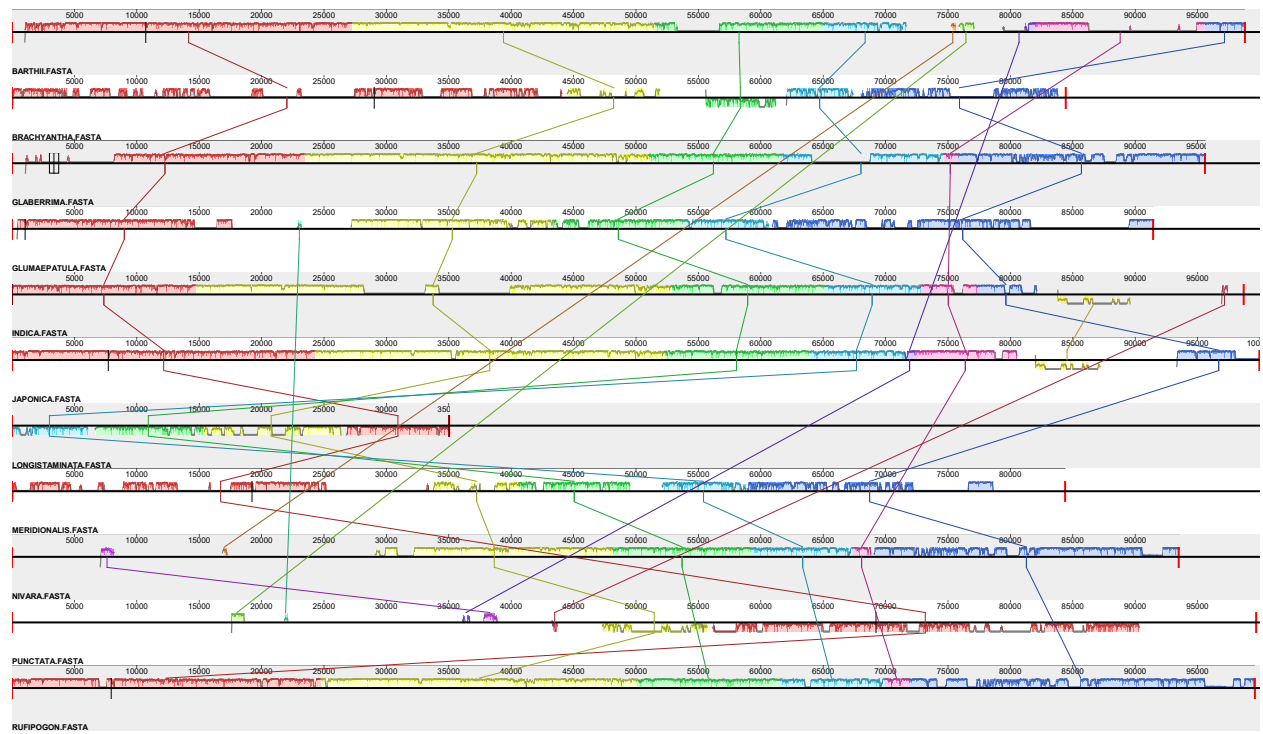

Supplement: s1 [file s1]

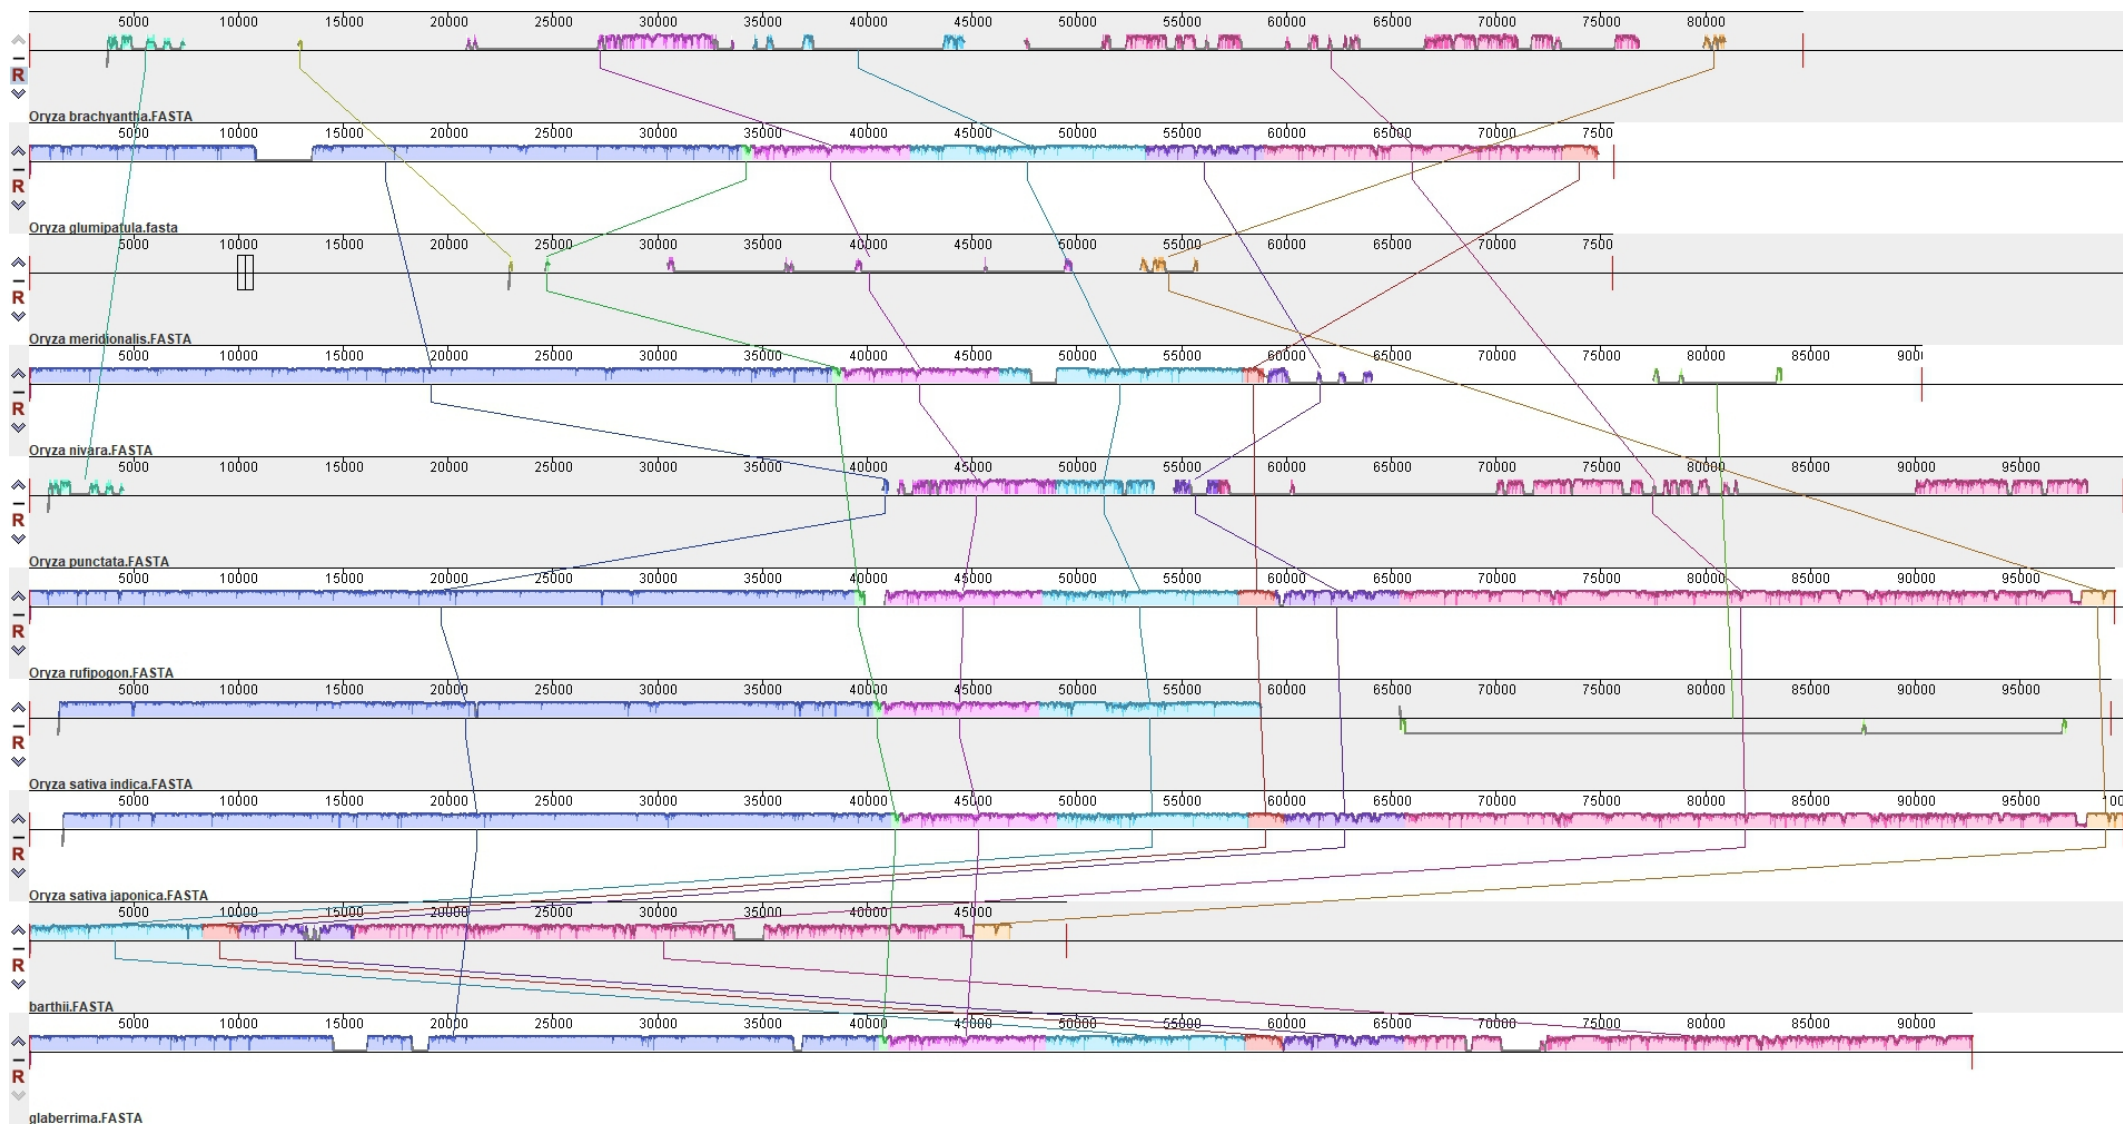

Supplement: s1 [file s1]

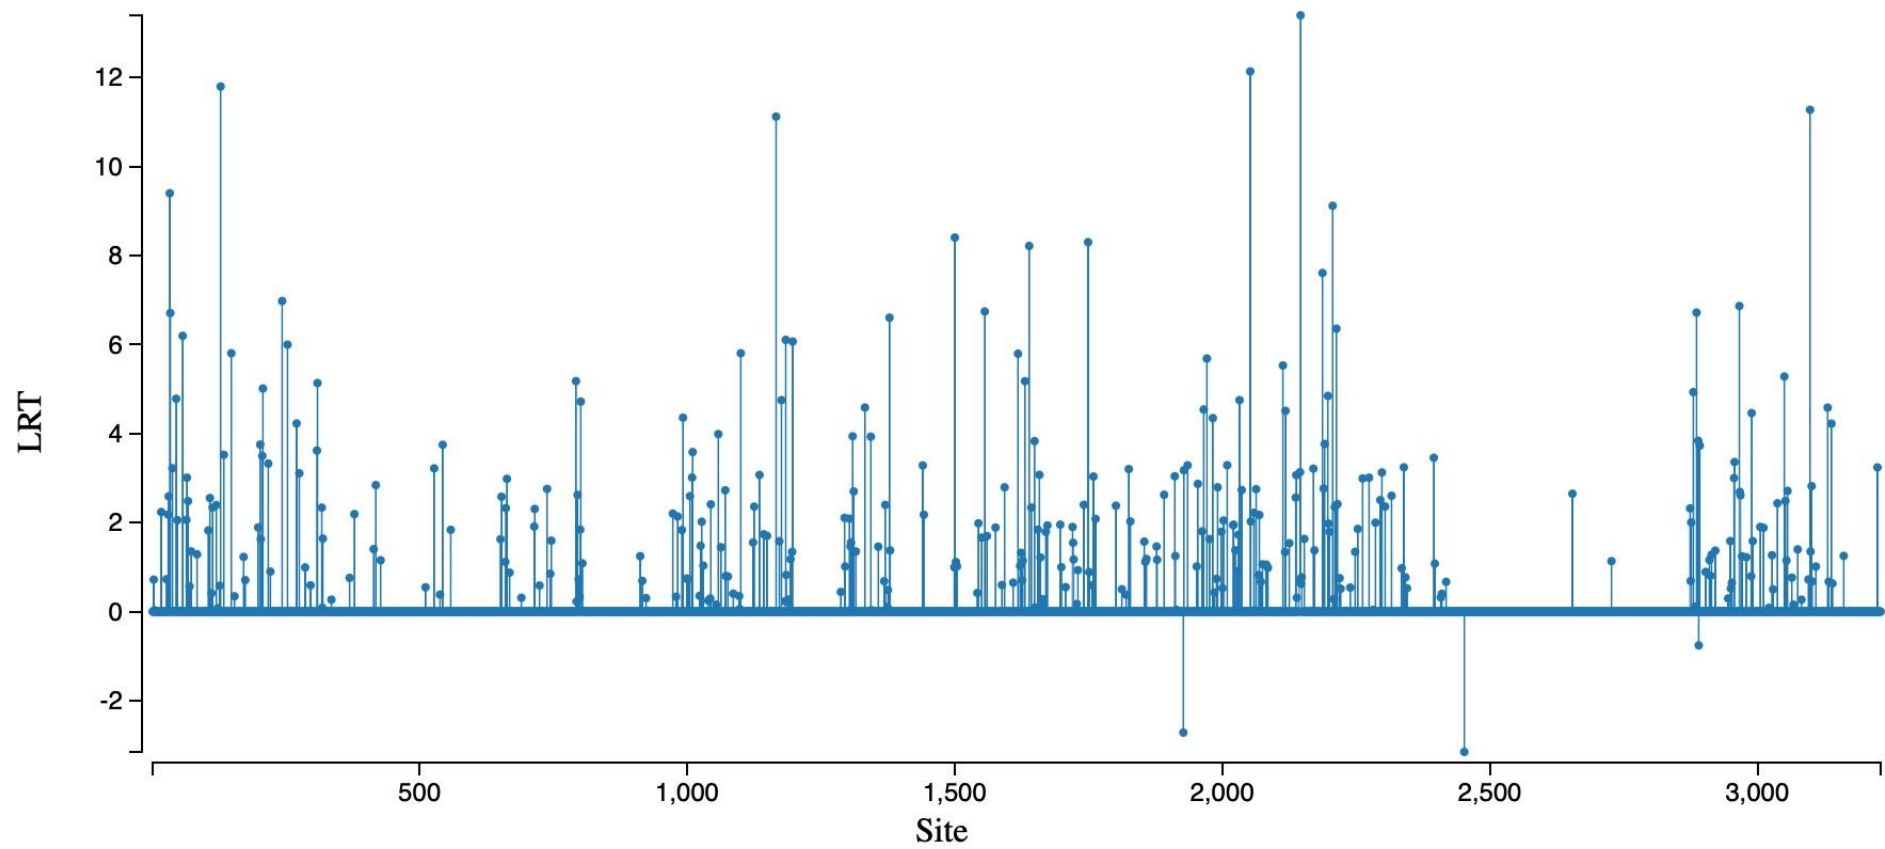

Supplement: s1 [file s1]

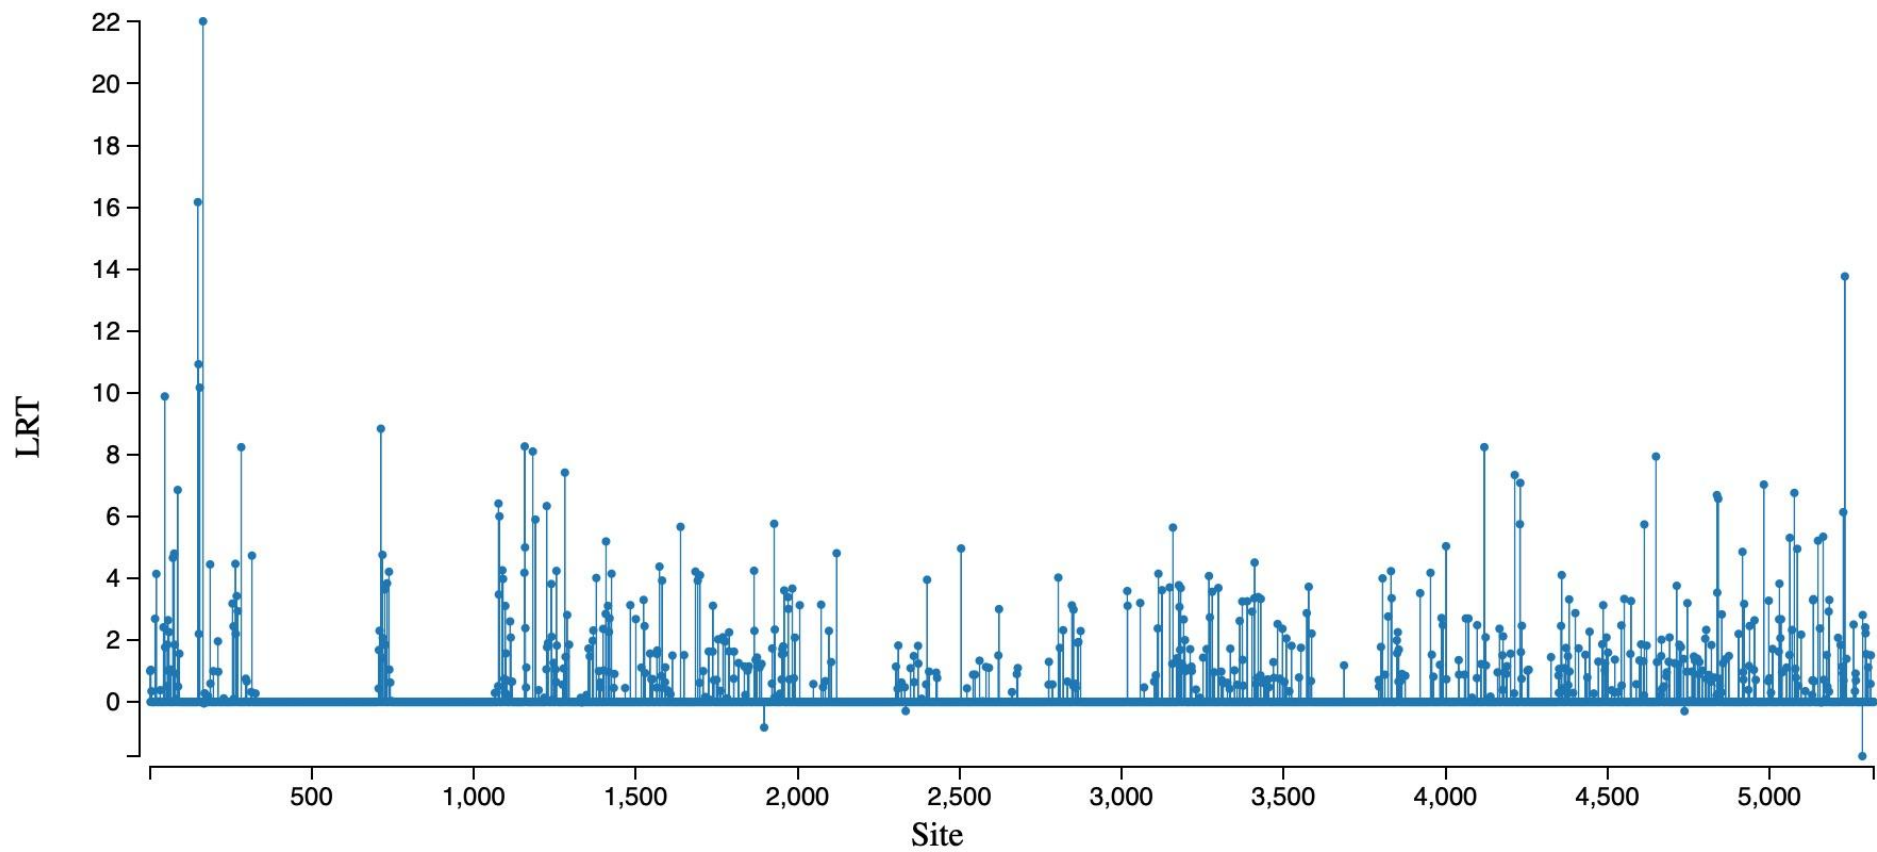

Supplement: s1 [file s1]

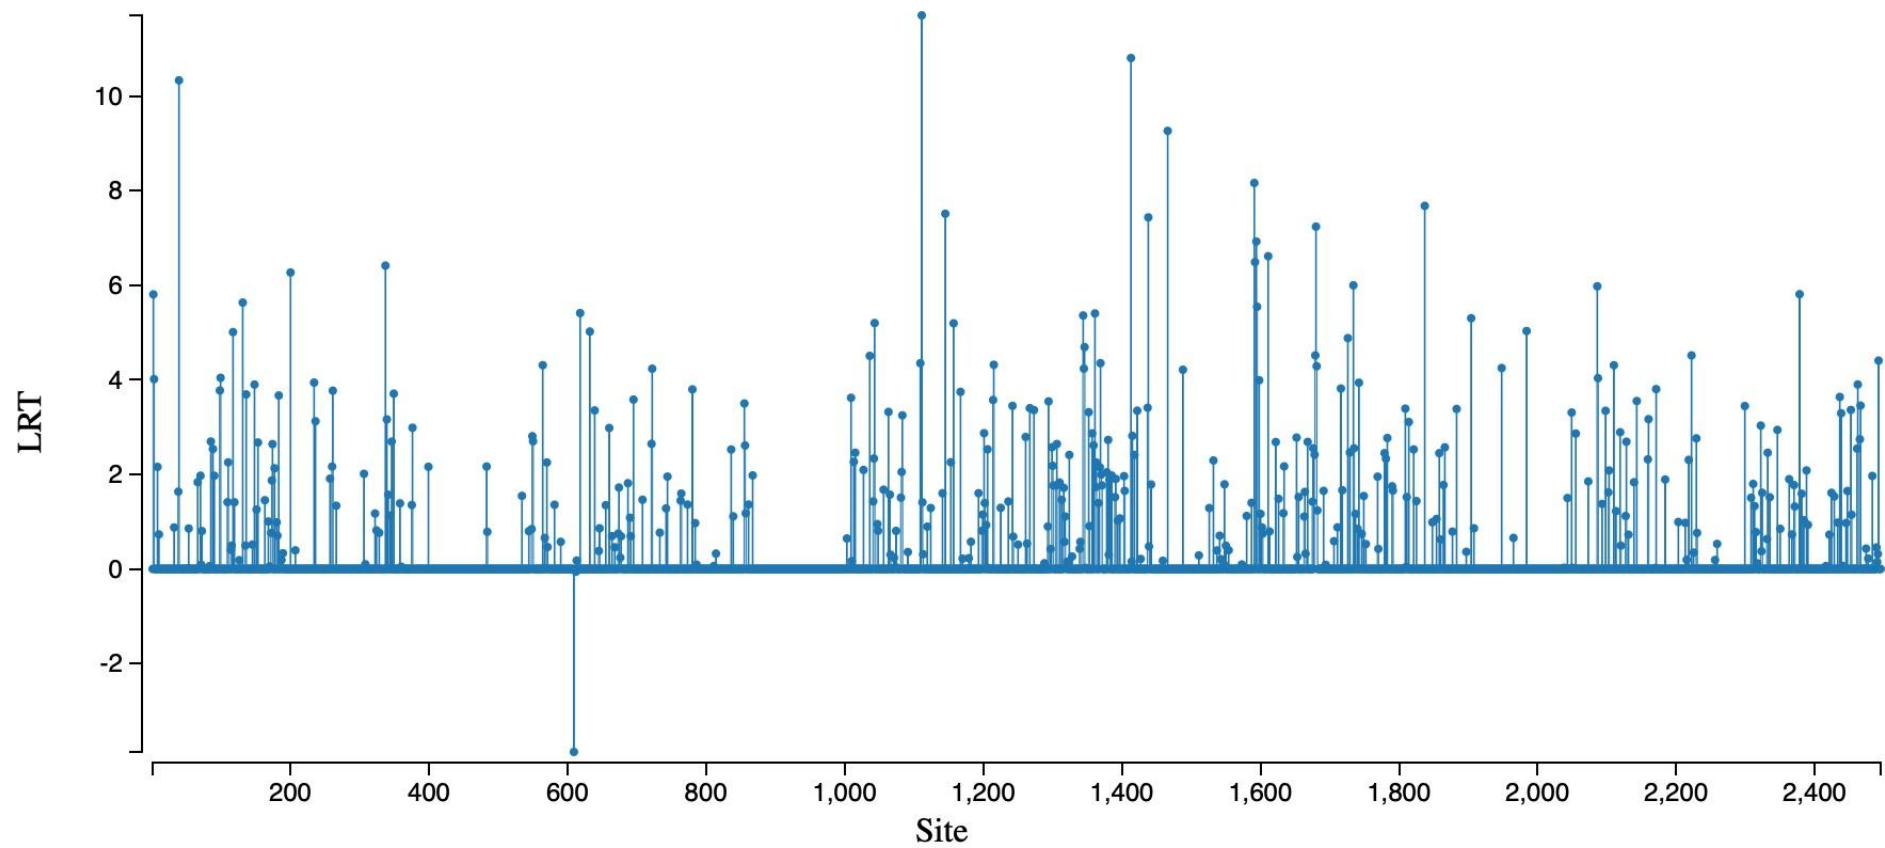

Supplement: s1 [file s1]
